# Supplementary material for: Prevalence and subtype distribution of Blastocystis sp. isolates from poultry in Lebanon and evidence of zoonotic potential
Source: PubMed Central journal article supplement (PMC6030734; doi:10.1186/s13071-018-2975-5), 2018-07-04
Supplement: 13071_2018_2975_MOESM1_ESM.pdf [file 13071_2018_2975_MOESM1_ESM.pdf]

**Additional file 1** Origin (farm) and season of collection of chicken samples from slaughterhouses and *Blastocystis* sp. identification

**Slaughterhouse A**

| <b>Spring<br/>Sample/Farm</b> | <b>qPCR and<br/><i>Blastocystis</i> sp.<br/>ST</b> | <b>Summer<br/>Sample/Farm</b> | <b>qPCR and<br/><i>Blastocystis</i> sp.<br/>ST</b> | <b>Autumn<br/>Sample/Farm</b> | <b>qPCR and<br/><i>Blastocystis</i> sp.<br/>ST</b> | <b>Winter<br/>Sample/Farm</b> | <b>qPCR and<br/><i>Blastocystis</i> sp.<br/>ST</b> |
|-------------------------------|----------------------------------------------------|-------------------------------|----------------------------------------------------|-------------------------------|----------------------------------------------------|-------------------------------|----------------------------------------------------|
| WIC1/F1                       | -                                                  | WIC31/F1                      | -                                                  | WIC61/F1                      | -                                                  | WIC91/F1                      | + /ST6                                             |
| WIC2/F2                       | -                                                  | WIC32/F2                      | + /ST6                                             | WIC62/F2                      | -                                                  | WIC92/F2                      | -                                                  |
| WIC3/F3                       | -                                                  | WIC33/F3                      | -                                                  | WIC63/F3                      | -                                                  | WIC93/F3                      | + /ST6                                             |
| WIC4/F4                       | -                                                  | WIC34/F4                      | -                                                  | WIC64/F4                      | -                                                  | WIC94/F4                      | + /ST6                                             |
| WIC5/F5                       | + /ST6                                             | WIC35/F5                      | -                                                  | WIC65/F5                      | -                                                  | WIC95/F5                      | + /ST6                                             |
| WIC6/F6                       | -                                                  | WIC36/F6                      | + /ST7                                             | WIC66/F6                      | -                                                  | WIC96/F6                      | + /ST6                                             |
| WIC7/F7                       | -                                                  | WIC37/F7                      | + /ST7                                             | WIC67/F7                      | + /ST6                                             | WIC97/F7                      | -                                                  |
| WIC8/F8                       | -                                                  | WIC38/F8                      | + /ST6                                             | WIC68/F8                      | -                                                  | WIC98/F8                      | -                                                  |
| WIC9/F9                       | + /ST6                                             | WIC39/F9                      | + /ST6                                             | WIC69/F9                      | -                                                  | WIC99/F9                      | -                                                  |
| WIC10/F10                     | + /ST6                                             | WIC40/F10                     | -                                                  | WIC70/F10                     | -                                                  | WIC100/F10                    | + /ST6                                             |
| WIC11/F11                     | + /ST6                                             | WIC41/F11                     | + /ST6                                             | WIC71/F11                     | + /ST6                                             | WIC101/F11                    | -                                                  |
| WIC12/F12                     | -                                                  | WIC42/F12                     | + /ST6                                             | WIC72/F12                     | + /ST6                                             | WIC102/F12                    | -                                                  |
| WIC13/F13                     | -                                                  | WIC43/F13                     | -                                                  | WIC73/F13                     | -                                                  | WIC103/F13                    | -                                                  |
| WIC14/F14                     | + /ST6                                             | WIC44/F14                     | -                                                  | WIC74/F14                     | -                                                  | WIC104/F14                    | -                                                  |
| WIC15/F15                     | -                                                  | WIC45/F15                     | + /ST6                                             | WIC75/F15                     | -                                                  | WIC105/F15                    | -                                                  |
| WIC16/F16                     | -                                                  | WIC46/F16                     | + /ST6                                             | WIC76/F16                     | -                                                  | WIC106/F16                    | -                                                  |
| WIC17/F17                     | + /ST6                                             | WIC47/F17                     | -                                                  | WIC77/F17                     | + /ST6                                             | WIC107/F17                    | -                                                  |
| WIC18/F18                     | -                                                  | WIC48/F18                     | + /ST6                                             | WIC78/F18                     | -                                                  | WIC108/F18                    | -                                                  |
| WIC19/F19                     | -                                                  | WIC49/F19                     | -                                                  | WIC79/F19                     | -                                                  | WIC109/F19                    | -                                                  |
| WIC20/F20                     | -                                                  | WIC50/F20                     | -                                                  | WIC80/F20                     | + /ST6                                             | WIC110/F20                    | -                                                  |
| WIC21/F21                     | + /ST6                                             | WIC51/F21                     | -                                                  | WIC81/F21                     | -                                                  | WIC111/F21                    | -                                                  |

|           |       |           |       |           |       |            |       |
|-----------|-------|-----------|-------|-----------|-------|------------|-------|
| WIC22/F22 | +/ST6 | WIC52/F22 | +/ST7 | WIC82/F22 | -     | WIC112/F22 | -     |
| WIC23/F23 | -     | WIC53/F23 | -     | WIC83/F23 | +/ST6 | WIC113/F23 | -     |
| WIC24/F24 | -     | WIC54/F24 | +/ST6 | WIC84/F24 | -     | WIC114/F24 | +/ST6 |
| WIC25/F25 | +/ST6 | WIC55/F25 | -     | WIC85/F25 | +/ST6 | WIC115/F25 | +/ST7 |
| WIC26/F26 | +/ST6 | WIC56/F26 | +/ST6 | WIC86/F26 | +/ST6 | WIC116/F26 | -     |
| WIC27/F27 | -     | WIC57/F27 | -     | WIC87/F27 | -     | WIC117/F27 | -     |
| WIC28/F28 | -     | WIC58/F28 | +/ST6 | WIC88/F28 | -     | WIC118/F28 | -     |
| WIC29/F29 | -     | WIC59/F29 | -     | WIC89/F29 | +/ST7 | WIC119/F29 | -     |
| WIC30/F30 | -     | WIC60/F30 | +/ST6 | WIC90/F30 | +/ST6 | WIC120/F30 | -     |

### Slaughterhouse B

| Summer      |                                     | Autumn      |                                     | Winter      |                                     |
|-------------|-------------------------------------|-------------|-------------------------------------|-------------|-------------------------------------|
| Sample/Farm | qPCR and <i>Blastocystis</i> sp. ST | Sample/Farm | qPCR and <i>Blastocystis</i> sp. ST | Sample/Farm | qPCR and <i>Blastocystis</i> sp. ST |
| HAC1/ F1    | NA <sup>a</sup>                     | HAC39/ F1   | -                                   | HAC77/ F1   | +/ST7                               |
| HAC2/ F2    | +/ST7                               | HAC40/ F2   | -                                   | HAC78/ F2   | -                                   |
| HAC3/ F3    | +/ST6                               | HAC41/ F3   | NA                                  | HAC79/ F3   | +/ST6                               |
| HAC4/ F4    | +/ST6                               | HAC42/ F4   | -                                   | HAC80/ F4   | +/ST6                               |
| HAC5/ F5    | NA                                  | HAC43/ F5   | NA                                  | HAC81/ F5   | -                                   |
| HAC6/ F6    | NA                                  | HAC44/ F6   | +/ST6                               | HAC82/ F6   | -                                   |
| HAC7/ F7    | -                                   | HAC45/ F7   | -                                   | HAC83/ F7   | -                                   |
| HAC8/ F8    | -                                   | HAC46/ F8   | NA                                  | HAC84/ F8   | -                                   |
| HAC9/ F9    | -                                   | HAC47/ F9   | -                                   | HAC85/ F9   | -                                   |
| HAC10/ F10  | +/ST6                               | HAC48/ F10  | -                                   | HAC86/ F10  | -                                   |
| HAC11/ F11  | -                                   | HAC49/ F11  | -                                   | HAC87/ F11  | NA                                  |

|            |       |            |       |             |       |
|------------|-------|------------|-------|-------------|-------|
| HAC12/ F12 | -     | HAC50/ F12 | NA    | HAC88/ F12  | -     |
| HAC13/ F13 | +/ST7 | HAC51/ F13 | NA    | HAC89/ F13  | NA    |
| HAC14/ F14 | -     | HAC52/ F14 | -     | HAC90/ F14  | -     |
| HAC15/ F15 | +/ST7 | HAC53/ F15 | -     | HAC91/ F15  | -     |
| HAC16/ F16 | -     | HAC54/ F16 | NA    | HAC92/ F16  | -     |
| HAC17/ F17 | -     | HAC55/ F17 | NA    | HAC93/ F17  | -     |
| HAC18/ F18 | -     | HAC56/ F18 | NA    | HAC94/ F18  | -     |
| HAC19/ F19 | -     | HAC57/ F19 | NA    | HAC95/ F19  | -     |
| HAC20/ F20 | +/ST7 | HAC58/ F20 | NA    | HAC96/ F20  | -     |
| HAC21/ F21 | -     | HAC59/ F21 | -     | HAC97/ F21  | -     |
| HAC22/ F22 | -     | HAC60/ F22 | NA    | HAC98/ F22  | ST6   |
| HAC23/ F23 | -     | HAC61/ F23 | NA    | HAC99/ F23  | NA    |
| HAC24/ F24 | -     | HAC62/ F24 | -     | HAC100/ F24 | ST6   |
| HAC25/ F25 | +/ST6 | HAC63/ F25 | -     | HAC101/ F25 | -     |
| HAC26/ F26 | -     | HAC64/ F26 | +/ST7 | HAC102/ F26 | NA    |
| HAC27/ F27 | -     | HAC65/ F27 | -     | HAC103/ F27 | NA    |
| HAC28/ F28 | -     | HAC66/ F28 | -     | HAC104/ F28 | -     |
| HAC29/ F29 | -     | HAC67/ F29 | -     | HAC105/ F29 | NA    |
| HAC30/ F30 | -     | HAC68/ F30 | -     | HAC106/ F30 | -     |
| HAC31/ F31 | -     | HAC69/ F31 | -     | HAC107/ F31 | +/ST6 |
| HAC32/ F32 | NA    | HAC70/ F32 | -     | HAC108/ F32 | -     |
| HAC33/ F33 | -     | HAC71/ F33 | -     | HAC109/ F33 | -     |
| HAC34/ F34 | NA    | HAC72/ F34 | -     | HAC110/ F34 | -     |
| HAC35/ F35 | -     | HAC73/ F35 | -     | HAC111/ F35 | -     |
| HAC36/ F36 | -     | HAC74/ F36 | -     | HAC112/ F36 | NA    |
| HAC37/ F37 | -     | HAC75/ F37 | +/ST6 | HAC113/ F37 | +/ST6 |
| HAC38/ F38 | +/ST6 | HAC76/ F38 | +/ST6 | HAC114/ F38 | -     |

<sup>a</sup> NA, sample not available

**Slaughterhouse C**

| <b>Summer</b>      |                                                    | <b>Autumn</b>      |                                                    | <b>Winter</b>      |                                                    |
|--------------------|----------------------------------------------------|--------------------|----------------------------------------------------|--------------------|----------------------------------------------------|
| <b>Sample/Farm</b> | <b>qPCR and<br/><i>Blastocystis</i> sp.<br/>ST</b> | <b>Sample/Farm</b> | <b>qPCR and<br/><i>Blastocystis</i> sp.<br/>ST</b> | <b>Sample/Farm</b> | <b>qPCR and<br/><i>Blastocystis</i> sp.<br/>ST</b> |
| SHU1/F1            | +/ST6                                              | SHU7/F1            | +/ST6                                              | SHU13/F1           | NA                                                 |
| SHU2/F2            | -                                                  | SHU8/F2            | NA <sup>a</sup>                                    | SHU14/F2           | -                                                  |
| SHU3/F3            | -                                                  | SHU9/F3            | +/ST6                                              | SHU15/F3           | NA                                                 |
| SHU4/F4            | +/ST7                                              | SHU10/F4           | NA                                                 | SHU16/F4           | +/ST7                                              |
| SHU5/F5            | -                                                  | SHU11/F5           | +/ST7                                              | SHU17/F5           | +/ST7                                              |
| SHU6/F6            | -                                                  | SHU12/F6           | +/ST7                                              | SHU18/F6           | NA                                                 |

<sup>a</sup> NA, sample not available
