# Supplementary material for: Prevalence and subtype distribution of Blastocystis sp. isolates from poultry in Lebanon and evidence of zoonotic potential
Source: PubMed Central journal article supplement (PMC6030734; doi:10.1186/s13071-018-2975-5), 2018-07-04
Supplement: 13071_2018_2975_MOESM4_ESM.pdf [file 13071_2018_2975_MOESM4_ESM.pdf]

|                                       |                       |                                       |    |
|---------------------------------------|-----------------------|---------------------------------------|----|
| BP25 Birds Colombia KF002518          | . . . . . * * *       | . . G . . . . .                       |    |
| QQ93-3 clone b Quail Japan AB091243   | . . . . . G * * *     | . . G . . . . .                       | 9  |
| WIC45 Chicken Lebanon                 | . . . . . A . . * * * | . . G . . . . .                       | 10 |
| WIC10 Chicken Lebanon                 | . . . . . * * *       | . . G . . . . . G . . . . .           |    |
| WIC26 Chicken Lebanon                 | . . . . . * * *       | . . G . . . . . G . . . . .           |    |
| WIC41 Chicken Lebanon                 | . . . . . * * *       | . . G . . . . . G . . . . .           |    |
| WIC56 Chicken Lebanon                 | . . . . . * * *       | . . G . . . . . G . . . . .           | 11 |
| WIC85 Chicken Lebanon                 | . . . . . * * *       | . . G . . . . . G . . . . .           |    |
| WIS20 Human Lebanon                   | . . . . . * * *       | . . G . . . . . G . . . . .           |    |
| ELY46 Human France KU159049           | . . . . . * * *       | . . . . . * * *                       | 12 |
| HJ04-2 Human Japan KT438692           | . . . . . * * *       | . G T G . . . . .                     | 13 |
| BJ99-310 Partridge Japan AB107972     | . . . . . * * *       | . G T G . . . . .                     |    |
| HJ04-7 Human Japan KT438697           | . . . . . * * *       | . G T G C . . . . .                   | 14 |
| HCF11 Human France KU159067           | . . . C . . . * * *   | . . . C . . . . . A . . . . *         | 15 |
| Case 3 Human Italy KP055708           | . G * . . . . * * *   | . T . . . . . G T . . . . .           | 16 |
| Shangai-2 Human China KX100585        | C . . . . . * * *     | . G T G C . . . . .                   | 17 |
| HJ96AS-1 clone b Human Japan AB091236 | . . . . . * * *       | . . G . . A G A . . . . . G . . . . . | 18 |
